# Supplementary material for: Prepregnancy and early pregnancy calcium supplementation among women at high risk of pre-eclampsia: a multicentre, double-blind, randomised, placebo-controlled trial
Source: PubMed Central journal article supplement (PMC6346082; doi:10.1016/s0140-6736(18)31818-x), 2019-01-26
Supplement: mmc1.pdf [file mmc1.pdf]

# THE LANCET

## Supplementary appendix

This appendix formed part of the original submission and has been peer reviewed. We post it as supplied by the authors.

Supplement to: Hofmeyr GJ, Betrán AP, Singata-Madliki M, et al. Prepregnancy and early pregnancy calcium supplementation among women at high risk of pre-eclampsia: a multicentre, double-blind, randomised, placebo-controlled trial. *Lancet* 2019; **393**: 330–39.

## Supplementary Appendix

Pre-pregnancy and early pregnancy calcium supplementation among women at high risk of pre-eclampsia: a multicentre, double-blind randomised, placebo-controlled trial

### 1. Description of the composition of the participants by country

**Table 1a. All participants at trial entry by country (n=1355)**

|         |              |   | Treatment Group |         | Total |
|---------|--------------|---|-----------------|---------|-------|
|         |              |   | Placebo         | Calcium |       |
| Country | Argentina    | n | 57              | 60      | 117   |
|         |              | % | 8.4%            | 8.8%    | 8.6%  |
|         | Zimbabwe     | n | 141             | 141     | 282   |
|         |              | % | 20.8%           | 20.8%   | 20.8% |
|         | South Africa | n | 479             | 477     | 956   |
|         |              | % | 70.8%           | 70.4%   | 70.6% |
| Total   |              |   | 677             | 678     | 1355  |

**Table 1b. Pregnant vs not pregnant by country (n=1355)**

|          |     |   | Country   |          |              | Total |
|----------|-----|---|-----------|----------|--------------|-------|
|          |     |   | Argentina | Zimbabwe | South Africa |       |
| Pregnant | No  | n | 84        | 104      | 516          | 704   |
|          |     | % | 71.8%     | 36.9%    | 54.0%        | 52.0% |
|          | Yes | n | 33        | 178      | 440          | 651   |
|          |     | % | 28.2%     | 63.1%    | 46.0%        | 48.0% |
| Total    |     |   | 117       | 282      | 956          | 1355  |

**Table 1c. Participants with pregnancy beyond 20 weeks' gestation by country (n=581)**

|         |              |   | Treatment Group |         | Total |
|---------|--------------|---|-----------------|---------|-------|
|         |              |   | Placebo         | Calcium |       |
| Country | Argentina    | n | 12              | 14      | 26    |
|         |              | % | 4.2%            | 4.7%    | 4.5%  |
|         | Zimbabwe     | n | 77              | 83      | 160   |
|         |              | % | 27.2%           | 27.9%   | 27.5% |
|         | South Africa | n | 194             | 201     | 395   |
|         |              | % | 68.6%           | 67.4%   | 68.0% |
| Total   |              |   | 283             | 298     | 581   |

**Table 1d. Participants with pre-eclampsia according to treatment group - Argentina**

| Argentina     |     |   |                 |         |        |        |
|---------------|-----|---|-----------------|---------|--------|--------|
|               |     |   | Treatment Group |         | Total  |        |
|               |     |   | Placebo         | Calcium |        |        |
| Pre-eclampsia | No  | n | 10              | 12      | 22     |        |
|               |     | % | 83.3%           | 85.7%   | 84.6%  |        |
|               | Yes | n | 2               | 2       | 4      |        |
|               |     | % | 16.7%           | 14.3%   | 15.4%  |        |
| Total         |     |   | n               | 12      | 14     | 26     |
|               |     |   | %               | 100.0%  | 100.0% | 100.0% |

**Table 1e. Participants with pre-eclampsia according to treatment group - Zimbabwe**

| Zimbabwe      |     |   |                 |         |        |
|---------------|-----|---|-----------------|---------|--------|
|               |     |   | Treatment Group |         | Total  |
|               |     |   | Placebo         | Calcium |        |
| Pre-eclampsia | No  | n | 71.4%           | 75.6%   | 73.6%  |
|               |     | % | 22              | 20      | 42     |
|               | Yes | n | 28.6%           | 24.4%   | 26.4%  |
|               |     | % | 77              | 82      | 159    |
| Total         |     | n | 12              | 100.0%  | 100.0% |
|               |     | % | 100.0%          | 71.4%   | 75.6%  |

**Table 1f. Participants with pre-eclampsia according to treatment group - South Africa**

| South Africa  |     |   |                 |         |        |
|---------------|-----|---|-----------------|---------|--------|
|               |     |   | Treatment Group |         | Total  |
|               |     |   | Placebo         | Calcium |        |
| Pre-eclampsia | No  | n | 136             | 153     | 289    |
|               |     | % | 70.1%           | 76.5%   | 73.4%  |
|               | Yes | n | 58              | 47      | 105    |
|               |     | % | 29.9%           | 23.5%   | 26.6%  |
| Total         |     | n | 194             | 200     | 394    |
|               |     | % | 100.0%          | 100.0%  | 100.0% |

## **2. Follow-up time of participants in the trial**

**Table 2. Duration of follow up of participants randomised**

| Treatment Group    |                     |        | Statistic      | Standard Error |
|--------------------|---------------------|--------|----------------|----------------|
| Placebo<br>(n=677) | Mean (months)       |        | 29.1           | 0.791          |
|                    | 95% CI              |        | Inferior limit | 27.6           |
|                    |                     |        | Superior limit | 30.7           |
|                    | Median              |        | 27.0           |                |
|                    | Variance            |        | 223.7          |                |
|                    | Standard deviation  |        | 15.0           |                |
|                    | Minimum             |        | 2.0            |                |
|                    | Maximum             |        | 68.0           |                |
|                    | Range               |        | 66.0           |                |
|                    | Interquartile range |        | 21.0           |                |
| Asymmetry          |                     | 0.493  | 0.129          |                |
| Kurtosis           |                     | -0.479 | 0.257          |                |
| Calcium<br>(n=678) | Mean (months)       |        | 28.3           | 0.787          |
|                    | 95% CCI             |        | Inferior limit | 26.8           |
|                    |                     |        | Superior limit | 29.9           |
|                    | Median              |        | 27.0           |                |
|                    | Variance            |        | 215.0          |                |
|                    | Standard deviation  |        | 14.7           |                |
|                    | Minimum             |        | 2.0            |                |
|                    | Maximum             |        | 67.0           |                |
|                    | Range               |        | 65.0           |                |
|                    | Interquartile range |        | 20.0           |                |
| Asymmetry          |                     | 0.444  | 0.131          |                |
| Kurtosis           |                     | -0.399 | 0.261          |                |
